1 **Towards next generation diagnostics for tuberculosis: identification of novel**  
2 **molecular targets by large-scale comparative genomics.**

3

4 Galo A. Goig<sup>1</sup>, Manuela Torres-Puente<sup>1</sup>, Carla Mariner-Llicer<sup>1</sup>, Luis M. Villamayor<sup>2</sup>,  
5 Álvaro Chiner-Oms<sup>3</sup>, Ana Gil-Brusola<sup>4</sup>, Rafa Borrás, PhD<sup>5,6</sup> and Iñaki Comas<sup>1,7\*</sup>.

6

7 1 - Institute of Biomedicine of Valencia (CSIC), Valencia (46020), Spain

8 2 - FISABIO Public Health (CSISP), Valencia (46010), Spain

9 3 - Joint Research Unit FISABIO-Universitat de València (CIBERESP), Valencia  
10 (46010), Spain

11 4 - La Fe University and Polytechnic Hospital, Valencia, Spain

12 5 - University Clinic Hospital, Valencia (46010), Spain

13 6 - School of Medicine, University of Valencia, Valencia (46010), Spain

14 7 - CIBER in Epidemiology and Public Health, Madrid (28029), Spain

15

16

17

18

19

20

21

22

23

24

25

26

## 27 **Abstract**

28 Tuberculosis remains one of the main causes of death worldwide. The long and  
29 cumbersome process of culturing *Mycobacterium tuberculosis* complex (MTBC)  
30 bacteria has encouraged the development of specific molecular tools for detecting  
31 the pathogen. Most of these tools aim to become novel tuberculosis diagnostics, and  
32 big efforts and resources are invested in their development, looking for the  
33 endorsement of the main public health agencies. Surprisingly, no study had been  
34 conducted where the vast amount of genomic data available is used to identify the  
35 best MTBC diagnostic markers. In this work, we use large-scale comparative  
36 genomics to provide a catalog of 30 characterized loci that are unique to the MTBC.  
37 Some of these genes could be targeted to assess the physiological status of the  
38 bacilli. Remarkably, none of the conventional MTBC markers is in our catalog. In  
39 addition, we develop a qPCR assay to accurately quantify MTBC DNA in clinical  
40 samples.

41

42

43

44

45

46

47

48

49

50

51

## 52 **Main text**

## 53 **Background**

54 Tuberculosis (TB) is the most lethal infectious disease caused by a single agent,  
55 namely bacteria belonging to the *Mycobacterium tuberculosis* complex (MTBC)[1].  
56 Whereas isolating the bacteria from clinical specimens is a time-consuming process  
57 that delays both clinical diagnosis and research workflows, rapid molecular tests  
58 have the potential to identify the pathogen DNA in a few hours [2,3]. This is the main  
59 reason why the development of new molecular tools for TB diagnosis is an active  
60 area of research, with many companies involved, looking for the endorsement of the  
61 World Health Organization (WHO) [4]. The most successful example has been the  
62 Xpert MTB/RIF test [5], which was endorsed by the WHO back in 2010 for TB  
63 diagnosis, and recommended as the first-line diagnostic in 2017[6]. Achieving a high  
64 sensitivity and specificity is pivotal for the development and improvement of  
65 molecular tests to ensure an accurate diagnosis. To this end, most tests incorporate  
66 specific markers for the detection of MTBC bacteria. For instance, the new Xpert  
67 MTB/RIF Ultra assay, previously targeting the *rpoB* gene alone, has now  
68 incorporated the insertion sequences IS6110 and IS1081[7]. The insertion sequence  
69 IS6110 has been extensively used as a MTBC-specific marker since first described  
70 in 1990[8]. In addition, the IS6110 can be present in high copy numbers in some  
71 MTBC strains (from 0 to 27 copies)[9], causing the nucleic acid amplification tests  
72 (NAAT) targeting this sequence to achieve higher sensitivities for strains carrying  
73 several copies. However, the specificity of the IS6110 has been questioned since  
74 two decades ago[10–15] what, along with the fact that some strains lack this  
75 insertion sequence, can lead to an incorrect diagnosis[16,17].

76 Several other genes have been used as markers for the accurate identification of  
77 MTBC bacteria[18–21]. However, the accuracy of NAATs based on these markers  
78 rely on the specificity of the primers, since most of the targeted loci are claimed to be  
79 MTBC-specific, yet they were evaluated with limited genomic information on the  
80 diversity of NTM and MTBC bacteria.

81 Nowadays, the use of the publicly available *omic* data can help identifying species-  
82 specific genetic markers to develop accurate molecular tools. Analyzing *omic* data  
83 has been proven to be an effective strategy for the identification of specific markers  
84 in several organisms[22–26], and even some workflows have been published for the  
85 evaluation of genetic markers based on genomic data[27]. For instance, comparative  
86 genomics was used by Zozaya-Valdés *et al.* to assess the population structure of  
87 *Mycobacterium chimaera*, identifying six specific loci of these organisms that allowed  
88 them to develop a highly accurate qPCR assay.

89 Strikingly, the use of comparative genomics for the identification of MTBC-specific  
90 loci has been very limited. The few published studies focused on genetic regions  
91 acquired by horizontal gene transfer and used the limited datasets available at the  
92 time of publication, a decade ago[28–30]. By contrast, last years have witnessed a  
93 burst of available genomic sequences of a wide range of mycobacteria species and  
94 thousands of strains of the MTBC[31–33].

95 In this work, we perform a large-scale comparative genomic analysis to provide a  
96 reference list of 30 MTBC-specific loci that will be of great utility for the scientific  
97 community working on the development of new research and clinical tools for  
98 tuberculosis. Remarkably, we found that the main MTBC markers used up to date  
99 are also present in other organisms, mainly NTM. In our analysis, we assess the  
100 global diversity of each MTBC-specific gene among a comprehensive dataset of

101 more than 4,700 MTBC strains, showing the value of using the genomic data at hand  
102 to identify the best targets for diagnostic assays. In addition, we develop a qPCR  
103 assay based on one of these markers capable of quantifying MTBC DNA in clinical  
104 samples.

105

## 106 **Methods**

### 107 **In silico identification of MTBC-specific diagnostic gene markers**

108 To identify MTBC-specific loci, we used blastn[34] to look for all the genes of the  
109 tuberculosis reference strain H37Rv (NC\_000962.3) in the NCBI nucleotide non-  
110 redundant database (accessed October 2018) and a custom database comprising  
111 4,277 NTM assemblies (Supplementary Methods 1). All the searches were  
112 performed specifying the algorithm blastn with a word size (or seed) of 7 bp. Then,  
113 we filtered the results with a set of stringent parameters to discard loci similar to any  
114 genomic region of any organism other than MTBC. We discarded all the genes that  
115 presented an alignment of more than 25% of its sequence (query coverage) with a  
116 similarity greater than 80%. If a gene was aligned in 60% of its sequence or longer it  
117 was discarded regardless of the similarity of the alignment. We only kept those  
118 genes that were present in all the MTBC bacteria.

119 Once potential MTBC-specific markers were identified, we decided to assess their  
120 genetic diversity. To do this, we analyzed the polymorphisms (single nucleotide  
121 polymorphisms (SNPs) and indels) observed at each position across a dataset  
122 comprising 4,766 genomes of MTBC strains[35]. Therefore, the number of SNPs of  
123 each gene was calculated as the sum of positions showing any nucleotide other than  
124 the reference. In the case of indels, we considered those positions showing an indel  
125 in at least 10 strains (0.2% of the database) to avoid the noise introduced by single-

126 strain indels spanning large genic regions and possible false deletions arising as a  
127 result of sequencings with uneven genomic coverages. This allowed us to calculate  
128 different metrics for each gene such as the absolute number of polymorphisms,  
129 polymorphisms per base and, most importantly, the prevalence of each one.  
130 Finally, we looked for available information of these genes in the bibliography, what  
131 allowed us to discard some candidates based on their genomic context and provide  
132 extended information about their physiology. We gathered transcriptomic and  
133 proteomic data derived from different published studies: transcriptomic data in  
134 response to overexpression of 206 transcription factors[36], different genotoxic  
135 stresses[37] and response to nitric oxide stress at different time-points[38], as well  
136 as proteomic data in response to nutrient starvation[39].

137

### 138 **Set-up of a MTBC-specific qPCR assay for DNA detection and quantification**

139 We used the list of 30 MTBC-specific loci to set up a qPCR assay for the detection  
140 and quantification of MTBC DNA. To select the target for the assay, we took into  
141 consideration the number of polymorphisms per base, the absence of high-prevalent  
142 polymorphisms, the gene length and its genomic context. These criteria enabled an  
143 optimum design of primers, amplifying a universal and highly-specific region for the  
144 detection of MTBC. We designed the primers and probes for the assay using the  
145 web tool Primer-BLAST[40], checking that no unspecific amplicons were predicted.  
146 Finally, the qPCR assay consisted on the amplification of a 65 bp region within the  
147 Rv2341 gene using the following primers: Forward-GCCGCTCATGCTCCTTGGAT,  
148 Reverse-AGGTCGGTTCGCTGGTCTTG, Probe-  
149 TGAGTGCCTGCGGCCGCAGCGC.

150 To test the specificity of the assay we performed qPCR experiments with DNA from  
151 all MTBC lineages (except lineage 7 due to unavailability), human DNA, a mock  
152 sample with mixed DNA from 20 different bacterial species (ATCC<sup>®</sup> MSA-1002<sup>™</sup>)  
153 and 17 different species of NTM (Supplementary Methods 2).  
154 The reaction efficiency was calculated using serial dilutions of pure H37Rv DNA as  
155 template (0.5 ng/ul to  $0.5 \times 10^{-5}$  ng/ul). In addition, we evaluated the performance of  
156 the assay detecting and quantifying MTBC DNA in a test set of clinical samples. We  
157 used extracted DNA from 12 homogenized sputum samples from culture-positive TB  
158 patients, two of them with negative smear microscopy. We also used a DNA  
159 extraction from a non-TB patient sputum to spike in known concentrations of pure  
160 H37Rv DNA (0.5 ng/ul to  $0.5 \times 10^{-5}$  ng/ul), to calculate the reaction efficiency in  
161 clinical samples.  
162 All the qPCR reactions were carried out using hydrolysis probes chemistry  
163 (FAM/BHQ) in a total volume of 20ul, containing 10ul of Kapa Probe Fast Master Mix  
164 2X (Kapa Biosystems), 250mM of each primer, 350mM of probe and 2ul of sample.  
165 All were performed in a Roche Lightcycler 96 (Roche Diagnostics), with two  
166 replicates per sample and including reactions with no template as negative controls  
167 (NTC). When calculating reaction efficiencies, we used three replicates per point  
168 instead of two. The conditions for each assay comprised an initial denaturation step  
169 at 95°C for 3 minutes, followed by 55 amplification cycles as follows: 20 seconds at  
170 60°C for annealing, 1 second at 72°C for extension, and 10 seconds at 95°C for  
171 denaturation. The results were analyzed with LightCycler 96<sup>®</sup> 1.1 software.  
172 Triplicates of each assay were carried out to check the reproducibility.

173

174 **Bacterial culture, clinical specimens and DNA extraction.**

175 All the DNA extractions were performed in our laboratory except for the commercial  
176 DNA mix of 20 bacterial species. Available cultures of different NTM species were  
177 subcultured in in 7H11 solid agar media and then the DNA extracted following the  
178 standard CTAB protocol[41] with an inactivation step of 1 hour at 80°C. DNA  
179 concentrations were measured with the Qubit fluorometer (dsDNA high-sensitivity  
180 kit) and samples with a concentration higher than 1ng/ul were normalized to 1ng/ul.  
181 In the case of the 13 sputum specimens, DNA extraction was performed as  
182 described by Votintseva *et al*[42]. All the samples were handled in a BSL-3 until DNA  
183 was extracted and purified.

184 **Ethics approval**

185 The clinical specimens used in this study were collected as part of the surveillance  
186 program of communicable diseases by the General Directorate of Public Health of  
187 the Comunidad Valenciana and, as such, falls outside the mandate of the  
188 corresponding Ethics Committee for Biomedical Research. All personal information  
189 was anonymized and no data allowing individual identification was retained.

190

191 **Results**

192

193 We identified 40 genes to be uniquely present in members of the MTBC according to  
194 our filtering parameters (Figure 1). After evaluating their genetic diversity across a  
195 database of more than 4,700 MTBC strains, we observed that the median number of  
196 SNPs per base was 0.07, with some of these genes showing either higher or lower  
197 diversities (up to 0.1 and 0.04 SNPs/base respectively), probably as a result of



198 different selective pressures. Importantly, although most of the polymorphisms  
199 analyzed were strain-specific, we observed high prevalent polymorphisms as well  
200 (Figure 1, Supplementary File 1). For instance, Rv0610c showed a SNP present in  
201 4182 strains and Rv2823c showed an insertion in 4,345 strains. Analysis of the  
202 phylogenetic distribution of these polymorphisms confirmed that they mapped to  
203 deep branches in the phylogeny. For example, the SNP in Rv0610c affected all  
204 modern lineages (L2, L3, L4).

205 Among these, 9 genes were discarded as potential diagnostic markers since they  
206 were included in regions of difference (RD) 182 (Rv2274c) and RD 207 (Rv2816c-  
207 Rv2820c) as described in Gagneux *et al.*[43] or were in variable genomic regions  
208 associated to CRISPR elements (Rv2816c-2823c)[44]. Another gene, Rv3424c was  
209 also discarded as we found it to be duplicated in a very labile genomic region,  
210 between the (putative) transposase of the insertion sequence IS1532 and PPE 59.  
211 Therefore, the curated list of MTBC-specific diagnostic markers finally consisted in  
212 30 genes (Figure 1).

213 When looking at published transcriptomic and proteomic data (see Methods), we  
214 observed that Rv2003c, Rv2142c, and Rv3472 proteins are found in greater levels  
215 (6.19, 3.6 and 100-fold respectively) when the bacteria is subjected to starvation.  
216 Interestingly, Rv2003c is also observed to be overexpressed upon treatment with  
217 nitric oxide (Supplementary File 2).

218 Based on our large genomic analysis, we set up a qPCR assay targeting the Rv2341  
219 gene. This gene, described as “probable conserved lipoprotein lppQ” in the  
220 Mycobrowser database[45], is situated in a stable genomic region, between the  
221 asparagine tRNA and the gene of the DNA primase, involved in the synthesizes of  
222 the okazaki fragments. Furthermore, we were able to design an optimized set of

223 primers that avoid, at the same time, any region harboring prevalent polymorphisms  
224 (Figure 1).

225 When testing the qPCR assay with a panel of samples including different MTBC  
226 lineages, human, mock bacterial communities and different NTMs, the specificity of  
227 the assay was of 100%. The efficiency of the reaction was of 95% showing a limit of  
228 detection of 10fg (hypothetically corresponding to 2 genome equivalents). When  
229 using a standard curve of pure H37Rv DNA spiked in sputum samples, both the  
230 efficiency of the reaction (97%) and the limit of detection remained unaltered (Figure  
231 2). When testing our qPCR assay with a panel of 12 TB sputum samples, we were  
232 able to detect and quantify MTBC DNA in all TB patient sputa, including 2 confirmed  
233 TB cases with a negative smear microscopy (Supplementary File 4).

234

## 235 **Discussion**

236 Identification of MTBC markers for the development of new diagnostic and research  
237 tools for tuberculosis has been an active area of research over the last decades,  
238 focusing on the direct or indirect detection of the tubercle bacilli. It is striking that for  
239 such a relevant disease, from both the epidemiological and economical point of view,  
240 for which tons of genomic data is already available, the identification of MTBC-  
241 specific genes had been relegated to the background. This has been probably  
242 motivated by the fact that current molecular tools have shown to perform well in most  
243 of situations. For instance, assays targeting the insertion sequence IS6110 ([46] or  
244 *rpoB*[47]). However, the available tools are not enough to stop the spread of the  
245 disease and for this reason many new generation diagnostics are still being  
246 developed with the aim to improve the accuracy of the existing ones and tackle their  
247 known flaws.

248 Our analysis provides invaluable information to develop such diagnostics, with a  
249 catalog of specific MTBC markers. Remarkably, some of the markers that we identify  
250 could be targeted to determine the physiological status of MTBC bacteria under  
251 certain conditions. For example, Rv2003c, overexpressed during starvation and  
252 upon treatment with nitric oxide[38,39], is also upregulated during dormancy[48].  
253 Similarly, Rv1374c has been described to be a small RNA that is highly expressed  
254 during exponential growth[49], and hence could be used to evaluate the replicative  
255 state of the bacilli.

256 Strikingly, none of the markers considered to be MTBC-specific up to date are in our  
257 list of unique MTBC genes. For instance, when examining in which species the  
258 IS6110 can be found, we observed several non-MTBC organisms, including 14  
259 NTMs, carrying at least one copy. The same is true for IS1081 and *mpt64*, present in  
260 38 and 6 NTM respectively (Supplementary File 3). Similarly, the short-chain  
261 dehydrogenase/reductase gene (SDR) (Rv0303, region 365,234–366,142), which  
262 has been recently described as a *M. tuberculosis*-specific marker[28], is actually  
263 present in several NTM, as revealed by a blastn search in the non-redundant  
264 database of the NCBI web server (accessed January 2019), and in our database of  
265 NTM assemblies (Supplementary File 5). The fact that IS6110 is still one of the most  
266 used genetic targets for MTBC DNA detection (for example in the new Xpert Ultra  
267 MTB/RIF assay[7]), highlights the great utility, and the necessity, of translating the  
268 results of genomic analyses to the laboratory.

269 To illustrate the translational potential of our work, we set up an accurate qPCR  
270 assay capable of quantifying MTBC DNA with 100% specificity and a sensitivity up to  
271 2 genome copies. Quantifying MTBC DNA from clinical samples is challenging due  
272 to the presence of PCR inhibitors along with great proportions of DNA from human

273 and oropharyngeal microbiota. However, this capability is invaluable not only for  
274 diagnostic purposes, but also in the research context, for example when developing  
275 new protocols[42,50]. Remarkably, our assay, targeting a small region of the Rv2341  
276 gene, showed an excellent performance in a test set of clinical specimens. However,  
277 we want to highlight that the list provided here comprehends 30 loci, from which  
278 many different molecular tools for tuberculosis could be developed.

279

280 Altogether, our analysis has a direct translational value, as it represents an important  
281 resource for research groups and companies involved in the development and  
282 improvement of novel TB diagnostics. For instance, the markers identified in this  
283 work could be used to improve existing tests such as the Xpert MTB/RIF assay, by  
284 including targets that we have demonstrated to be globally conserved and fully  
285 specific to the MTBC.

286

## 287 **Declarations**

## 288 **Competing Interests**

289 The authors declare no conflict of interest in this article.

290

## 291 **Funding Sources**

292 This work was supported by projects of the European Research Council (ERC)  
293 (638553-TB-ACCELERATE), Ministerio de Economía y Competitividad, and  
294 Ministerio de Ciencia, Innovación y Universidades (Spanish Government), SAF2013-  
295 43521-R, SAF2016-77346-R and SAF2017-92345-EXP (to IC), BES-2014-071066  
296 (to GAG), FPU 13/00913 (to ACO)

297

## 298 **Author Contributions**

299 GAG and IC designed the study and analyzed the data. GAG and ACO analyzed the  
300 4,766 MTBC strains dataset. GAG, MTP and CML performed the qPCR  
301 experiments. GAG and LMV cultured the non-tuberculous mycobacteria and  
302 performed the DNA extractions. AGB and RB did the microbiological identification of  
303 the isolates of non-tuberculous mycobacteria. RB provided the clinical specimens  
304 and clinical data. GAG and IC wrote the first draft of the manuscript. All authors  
305 contributed to the final version of the manuscript.

306

## 307 **Contact Information**

308 Corresponding author e-mail, Iñaki Comas: [icomas@ibv.csic.es](mailto:icomas@ibv.csic.es)

309

## 310 **References**

- 311 1. World Health Organization. Global Tuberculosis Report 2017. 2017.
- 312 2. Eddabra R, Benhassou HA. Rapid molecular assays for detection of  
313 tuberculosis. *Pneumonia*. BioMed Central. **2018**; 10(1):4.
- 314 3. Machado D, Couto I, Viveiros M. Advances in the molecular diagnosis of  
315 tuberculosis: From probes to genomes. *Infect Genet Evol*. **2018**; Available from:  
316 <http://dx.doi.org/10.1016/j.meegid.2018.11.021>
- 317 4. Pai M, Nicol MP, Boehme CC. Tuberculosis Diagnostics: State of the Art and  
318 Future Directions. *Microbiol Spectr*. **2016**; 4(5). Available from: [http://dx.doi.org/](http://dx.doi.org/10.1128/microbiolspec.TBTB2-0019-2016)  
319 [10.1128/microbiolspec.TBTB2-0019-2016](http://dx.doi.org/10.1128/microbiolspec.TBTB2-0019-2016)

- 320 5. Cirillo DM, Miotto P, Tortoli E. Evolution of Phenotypic and Molecular Drug  
321 Susceptibility Testing. *Adv Exp Med Biol.* **2017**; 1019:221–246.
- 322 6. WHO meeting report of a technical expert consultation: non-inferiority analysis  
323 of Xpert MTF/RIF Ultra compared to Xpert MTB/RIF. Geneva: World Health  
324 Organization; **2017** (WHO/HTM/TB/2017.04); Available from: [http://www.who.int/  
325 tb/publications/2017/XpertUltra/en/](http://www.who.int/tb/publications/2017/XpertUltra/en/)
- 326 7. Dorman SE, Schumacher SG, Alland D, et al. Xpert MTB/RIF Ultra for detection  
327 of *Mycobacterium tuberculosis* and rifampicin resistance: a prospective  
328 multicentre diagnostic accuracy study. *Lancet Infect Dis.* **2018**; 18(1):76–84.
- 329 8. Thierry D, Brisson-Noël A, Vincent-Lévy-Frébault V, Nguyen S, Guesdon JL,  
330 Gicquel B. Characterization of a *Mycobacterium tuberculosis* insertion  
331 sequence, IS6110, and its application in diagnosis. *J Clin Microbiol.* **1990**;  
332 28(12):2668–2673.
- 333 9. Roychowdhury T, Mandal S, Bhattacharya A. Analysis of IS6110 insertion sites  
334 provide a glimpse into genome evolution of *Mycobacterium tuberculosis*. *Sci*  
335 *Rep.* **2015**; 5:12567.
- 336 10. Kent L, McHugh TD, Billington O, Dale JW, Gillespie SH. Demonstration of  
337 homology between IS6110 of *Mycobacterium tuberculosis* and DNAs of other  
338 *Mycobacterium spp.* *J Clin Microbiol.* **1995**; 33(9):2290–2293.
- 339 11. Liébana E, Aranaz A, Francis B, Cousins D. Assessment of genetic markers for  
340 species differentiation within the *Mycobacterium tuberculosis* complex. *J Clin*  
341 *Microbiol.* **1996**; 34(4):933–938.

- 342 12. McHugh TD, Newport LE, Gillespie SH. IS6110 homologs are present in  
343 multiple copies in mycobacteria other than tuberculosis-causing mycobacteria. *J*  
344 *Clin Microbiol.* **1997**; 35(7):1769–1771.
- 345 13. Hellyer TJ, DesJardin LE, Beggs ML, et al. IS6110 homologs are present in  
346 multiple copies in mycobacteria other than tuberculosis-causing mycobacteria. *J*  
347 *Clin Microbiol.* **1998**; 36(3):853–854.
- 348 14. Müller R, Roberts CA, Brown TA. Complications in the study of ancient  
349 tuberculosis: non-specificity of IS6110 PCRs. *STAR: Science & Technology of*  
350 *Archaeological Research.* **2015**; 1(1):1–8.
- 351 15. Coros A, DeConno E, Derbyshire KM. IS6110, a *Mycobacterium tuberculosis*  
352 complex-specific insertion sequence, is also present in the genome of  
353 *Mycobacterium smegmatis*, suggestive of lateral gene transfer among  
354 mycobacterial species. *J Bacteriol.* **2008**; 190(9):3408–3410.
- 355 16. Steensels D, Fauville-Dufaux M, Boie J, De Beenhouwer H. Failure of PCR-  
356 Based IS6110 analysis to detect vertebral spondylodiscitis caused by  
357 *Mycobacterium bovis*. *J Clin Microbiol.* **2013**; 51(1):366–368.
- 358 17. Huyen MNT, Tiemersma EW, Kremer K, et al. Characterisation of  
359 *Mycobacterium tuberculosis* isolates lacking IS6110 in Viet Nam. *Int J Tuberc*  
360 *Lung Dis.* **2013**; 17(11):1479–1485.
- 361 18. Therese KL, Jayanthi U, Madhavan HN. Application of nested polymerase chain  
362 reaction (nPCR) using MPB 64 gene primers to detect *Mycobacterium*  
363 *tuberculosis* DNA in clinical specimens from extrapulmonary tuberculosis  
364 patients. *Indian J Med Res.* **2005**; 122(2):165–170.

- 365 19. Chakravorty S, Sen MK, Tyagi JS. Diagnosis of extrapulmonary tuberculosis by  
366 smear, culture, and PCR using universal sample processing technology. *J Clin*  
367 *Microbiol.* **2005**; 43(9):4357–4362.
- 368 20. Nimesh M, Joon D, Pathak AK, Saluja D. Comparative study of diagnostic  
369 accuracy of established PCR assays and in-house developed *sdaA* PCR  
370 method for detection of *Mycobacterium tuberculosis* in symptomatic patients  
371 with pulmonary tuberculosis. *J Infect.* **2013**; 67(5):399–407.
- 372 21. Queipo-Ortuño MI, Colmenero JD, Bermudez P, Bravo MJ, Morata P. Rapid  
373 differential diagnosis between extrapulmonary tuberculosis and focal  
374 complications of brucellosis using a multiplex real-time PCR assay. *PLoS One.*  
375 **2009**; 4(2):e4526.
- 376 22. Carmona SJ, Sartor PA, Leguizamón MS, Campetella OE, Agüero F. Diagnostic  
377 peptide discovery: prioritization of pathogen diagnostic markers using multiple  
378 features. *PLoS One.* **2012**; 7(12):e50748.
- 379 23. Buchanan CJ, Webb AL, Mutschall SK, et al. A Genome-Wide Association  
380 Study to Identify Diagnostic Markers for Human Pathogenic *Campylobacter*  
381 *jejuni* Strains. *Front Microbiol.* **2017**; 8:1224.
- 382 24. Carrera M, Böhme K, Gallardo JM, Barros-Velázquez J, Cañas B, Calo-Mata P.  
383 Characterization of Foodborne Strains of *Staphylococcus aureus* by Shotgun  
384 Proteomics: Functional Networks, Virulence Factors and Species-Specific  
385 Peptide Biomarkers. *Front Microbiol.* **2017**; 8:2458.
- 386 25. Wang H, Drake SK, Yong C, et al. A Genoproteomic Approach to Detect  
387 Peptide Markers of Bacterial Respiratory Pathogens. *Clin Chem.* **2017**;



388 63(8):1398–1408.

389 26. Koul S, Kumar P. A Unique Genome Wide Approach to Search Novel Markers  
390 for Rapid Identification of Bacterial Pathogens. *J Mol Genet Med.* **2015**; 09(04).

391 27. Felten A, Guillier L, Radomski N, Mistou M-Y, Lailier R, Cadel-Six S. Genome  
392 Target Evaluator (GTEvaluator): A workflow exploiting genome dataset to  
393 measure the sensitivity and specificity of genetic markers. *PLoS One.* **2017**;  
394 12(7):e0182082.

395 28. Kakhki RK, Neshani A, Sankian M, Ghazvini K, Hooshyar A, Sayadi M. The  
396 short-chain dehydrogenases/reductases (SDR) gene: A new specific target for  
397 rapid detection of *Mycobacterium tuberculosis* complex by modified comparative  
398 genomic analysis. *Infect Genet Evol.* **2019**; Available from:  
399 <http://dx.doi.org/10.1016/j.meegid.2019.01.012>

400 29. Becq J, Gutierrez MC, Rosas-Magallanes V, et al. Contribution of horizontally  
401 acquired genomic islands to the evolution of the tubercle bacilli. *Mol Biol Evol.*  
402 **2007**; 24(8):1861–1871.

403 30. Veyrier F, Pletzer D, Turenne C, Behr MA. Phylogenetic detection of horizontal  
404 gene transfer during the step-wise genesis of *Mycobacterium tuberculosis*. *BMC*  
405 *Evol Biol.* **2009**; 9:196.

406 31. Fedrizzi T, Meehan CJ, Grottola A, et al. Genomic characterization of  
407 Nontuberculous Mycobacteria. *Sci Rep.* Nature Publishing Group; **2017**;  
408 7:45258.

409 32. Coll F, Phelan J, Hill-Cawthorne GA, et al. Genome-wide analysis of multi- and

- 410 extensively drug-resistant *Mycobacterium tuberculosis*. Nat Genet. Nature  
411 Publishing Group; **2018**; 50(2):307.
- 412 33. CRyPTIC Consortium and the 100,000 Genomes Project, Allix-Béguec C,  
413 Arandjelovic I, et al. Prediction of Susceptibility to First-Line Tuberculosis Drugs  
414 by DNA Sequencing. N Engl J Med. **2018**; 379(15):1403–1415.
- 415 34. Altschul SF, Gish W, Miller W, Myers EW, Lipman DJ. Basic local alignment  
416 search tool. J Mol Biol. **1990**; 215(3):403–410.
- 417 35. Chiner-Oms Á, González-Candelas F, Comas I. Gene expression models based  
418 on a reference laboratory strain are poor predictors of *Mycobacterium*  
419 *tuberculosis* complex transcriptional diversity. Sci Rep. **2018**; 8(1):3813.
- 420 36. Turkarslan S, Peterson EJR, Rustad TR, et al. A comprehensive map of  
421 genome-wide gene regulation in *Mycobacterium tuberculosis*. Sci Data. **2015**;  
422 2:150010.
- 423 37. Namouchi A, Gómez-Muñoz M, Frye SA, et al. The *Mycobacterium tuberculosis*  
424 transcriptional landscape under genotoxic stress. BMC Genomics. **2016**;  
425 17(1):791.
- 426 38. Cortes T, Schubert OT, Banaei-Esfahani A, Collins BC, Aebersold R, Young DB.  
427 Delayed effects of transcriptional responses in *Mycobacterium tuberculosis*  
428 exposed to nitric oxide suggest other mechanisms involved in survival. Sci Rep.  
429 **2017**; 7(1):8208.
- 430 39. Albrethsen J, Agner J, Piersma SR, et al. Proteomic profiling of *Mycobacterium*  
431 *tuberculosis* identifies nutrient-starvation-responsive toxin-antitoxin systems. Mol

- 432 Cell Proteomics. **2013**; 12(5):1180–1191.
- 433 40. Ye J, Coulouris G, Zaretskaya I, Cutcutache I, Rozen S, Madden TL. Primer-  
434 BLAST: a tool to design target-specific primers for polymerase chain reaction.  
435 BMC Bioinformatics. **2012**; 13:134.
- 436 41. Somerville W, Thibert L, Schwartzman K, Behr MA. Extraction of  
437 *Mycobacterium tuberculosis* DNA: a question of containment. J Clin Microbiol.  
438 **2005**; 43(6):2996–2997.
- 439 42. Votintseva AA, Bradley P, Pankhurst L, et al. Same-day diagnostic and  
440 surveillance data for tuberculosis via whole genome sequencing of direct  
441 respiratory samples [Internet]. J Clin Microbiol. **2017**; 55(5):1285–1298.
- 442 43. Gagneux S, DeRiemer K, Van T, et al. Variable host-pathogen compatibility in  
443 *Mycobacterium tuberculosis*. Proc Natl Acad Sci U S A. **2006**; 103(8):2869–  
444 2873.
- 445 44. Freidlin PJ, Nissan I, Luria A, et al. Structure and variation of CRISPR and  
446 CRISPR-flanking regions in deleted-direct repeat region *Mycobacterium*  
447 *tuberculosis* complex strains. BMC Genomics. **2017**; 18(1):168.
- 448 45. Kapopoulou A, Lew JM, Cole ST. The MycoBrowser portal: A comprehensive  
449 and manually annotated resource for mycobacterial genomes. Tuberculosis .  
450 **2011**; 91(1):8–13.
- 451 46. Harkins KM, Buikstra JE, Campbell T, et al. Screening ancient tuberculosis with  
452 qPCR: challenges and opportunities. Philos Trans R Soc Lond B Biol Sci. **2015**;  
453 370(1660):20130622.

- 454 47. Li S, Liu B, Peng M, et al. Diagnostic accuracy of Xpert MTB/RIF for  
455 tuberculosis detection in different regions with different endemic burden: A  
456 systematic review and meta-analysis. PLoS One. Public Library of Science;  
457 **2017**; 12(7):e0180725.
- 458 48. Hegde SR, Rajasingh H, Das C, Mande SS, Mande SC. Understanding  
459 communication signals during mycobacterial latency through predicted genome-  
460 wide protein interactions and boolean modeling. PLoS One. **2012**; 7(3):e33893.
- 461 49. Arnvig KB, Comas I, Thomson NR, et al. Sequence-Based Analysis Uncovers  
462 an Abundance of Non-Coding RNA in the Total Transcriptome of  
463 *Mycobacterium tuberculosis*. PLoS Pathog. Public Library of Science; **2011**;  
464 7(11):e1002342.
- 465 50. Brown AC, Bryant JM, Einer-Jensen K, et al. Rapid Whole-Genome Sequencing  
466 of *Mycobacterium tuberculosis* Isolates Directly from Clinical Samples. J Clin  
467 Microbiol. **2015**; 53(7):2230–2237.

468

## 469 **Figure Legends**

470 **Figure 1.** The 40 *Mycobacterium tuberculosis* complex (MTBC)-specific loci  
471 identified after an extensive search with blast in the NCBI non-redundant nucleotide  
472 database and a custom database of 4,277 Non-tuberculous mycobacteria (NTM).  
473 Gene names in red indicate loci that were discarded as diagnostic markers for being  
474 within regions of difference (Rv2274c within RD 182 and Rv2816c-2820c within RD  
475 207), associated to CRISPR (Rv2816c-2823c) or duplicated in the genome  
476 (Rv3424c). Concentric circles represent genetic diversity metrics calculated by  
477 analyzing a dataset of 4,766 MTBC strains. Outer circle: heatmap representing the

478 number of SNPs per base. Blue circle: prevalence of each SNP of each gene across  
479 the database of MTBC strains. Inner, read circle: prevalence of each indel of each  
480 gene across the database of MTBC strains. Note that both inner circles have two  
481 scales, one from 0 to 300 strains and other from 300 to 4,800 strains. The region of  
482 the Rv2341 gene amplified in our qPCR assay, avoiding prevalent polymorphisms, is  
483 indicated in light yellow. Note that regions of difference 182 and 207 are clearly  
484 detected in our analysis, indicated as contiguous deleted regions in a high number of  
485 strains.

486

487 **Figure 2.** Standard curve for the qPCR assay targeting Rv2341 using known  
488 quantities of pure H37Rv DNA (in blue; efficiency=95%) and pure H37Rv DNA  
489 spiked in sputum samples (in red; efficiency=97%). In the upper x-axis is  
490 represented the hypothetical number of genome copies. All qPCR experiments were  
491 carried out in triplicates to check for reproducibility.

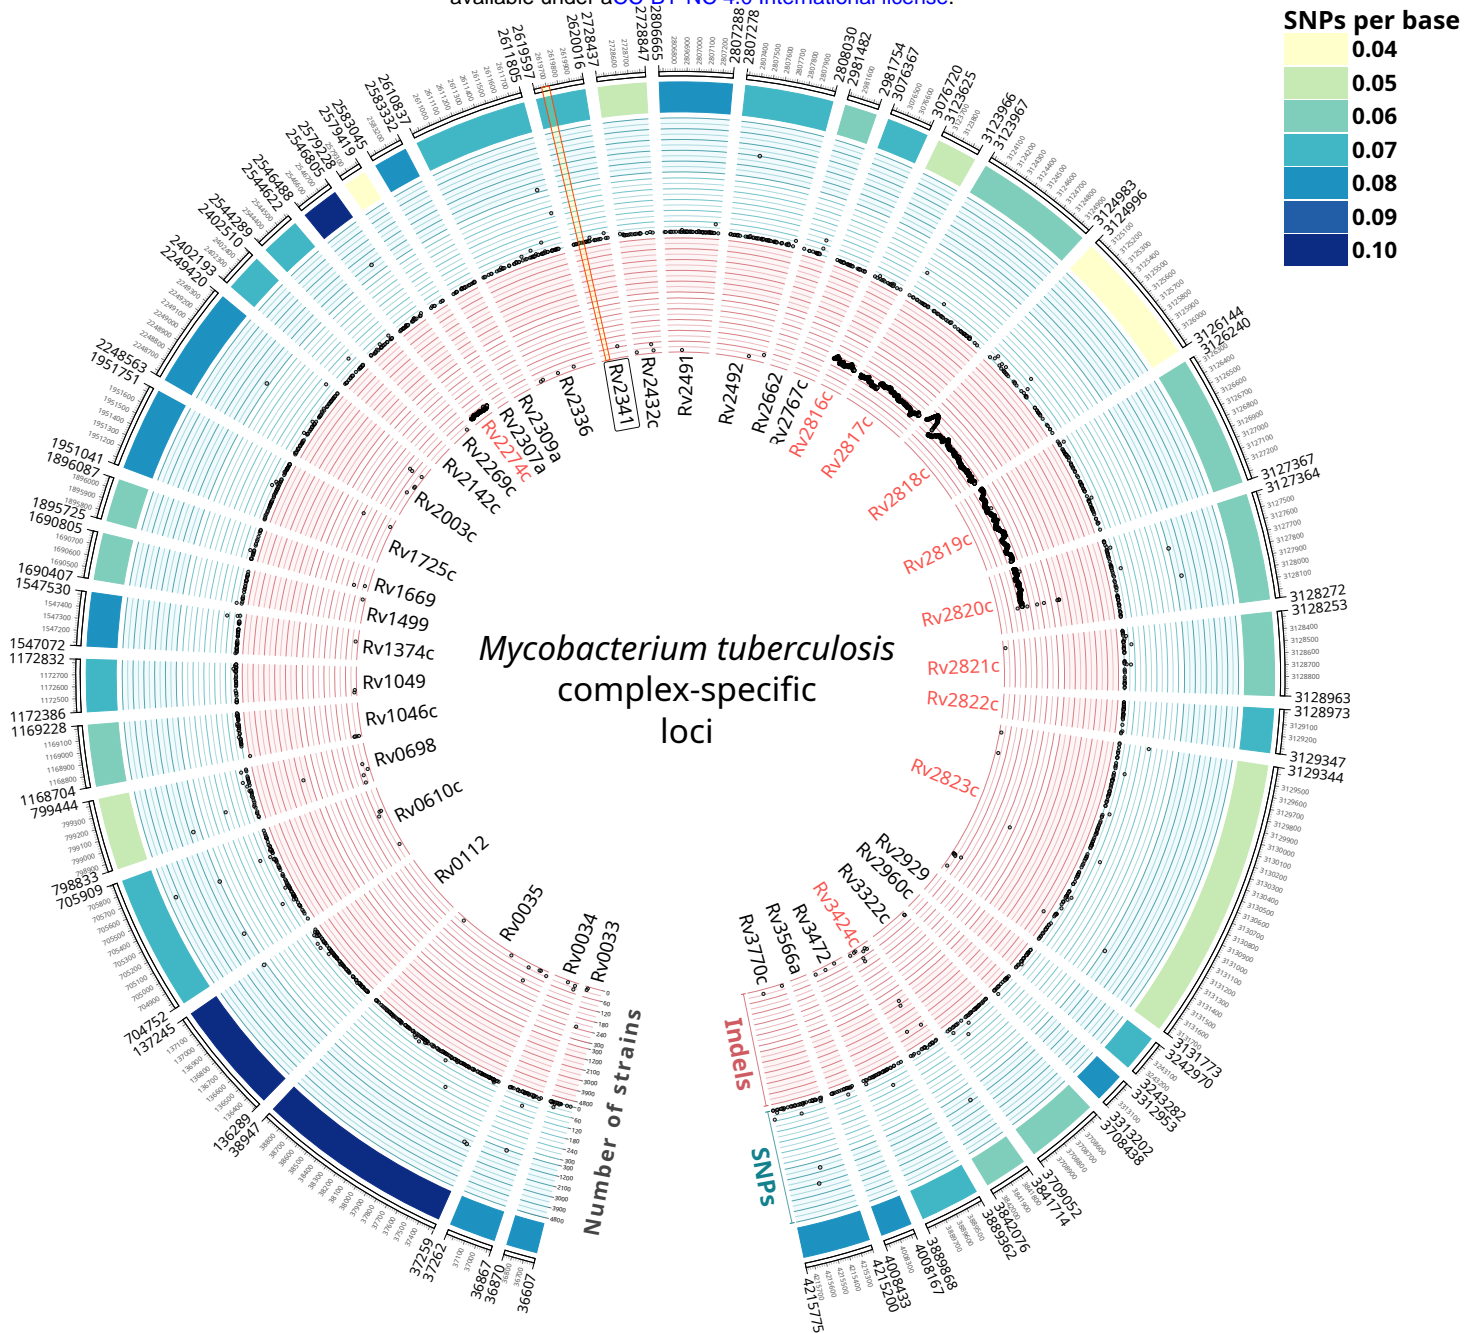

**Figure 1.** The 40 *Mycobacterium tuberculosis* complex (MTBC)-specific loci identified after an extensive search with blast in the NCBI non-redundant nucleotide database and a custom database of 4,277 Non-tuberculous mycobacteria (NTM). Gene names in red indicate loci that were discarded as diagnostic markers for being within regions of difference (Rv2274c within RD 182 and Rv2816c-2820c within RD 207), associated to CRISPR (Rv2816c-2823c) or duplicated in the genome (Rv3424c). Concentric circles represent genetic diversity metrics calculated by analyzing a dataset of 4,766 MTBC strains. Outer circle: heatmap representing the number of SNPs per base. Blue circle: prevalence of each SNP of each gene across the database of MTBC strains. Inner, read circle: prevalence of each indel of each gene across the database of MTBC strains. Note that both inner circles have two scales, one from 0 to 300 strains and other from 300 to 4,800 strains. The region of the Rv2341 gene amplified in our qPCR assay, avoiding prevalent polymorphisms, is indicated in light yellow. Note that regions of difference 182 and 207 are clearly detected in our analysis, indicated as contiguous deleted regions in a high number of strains.

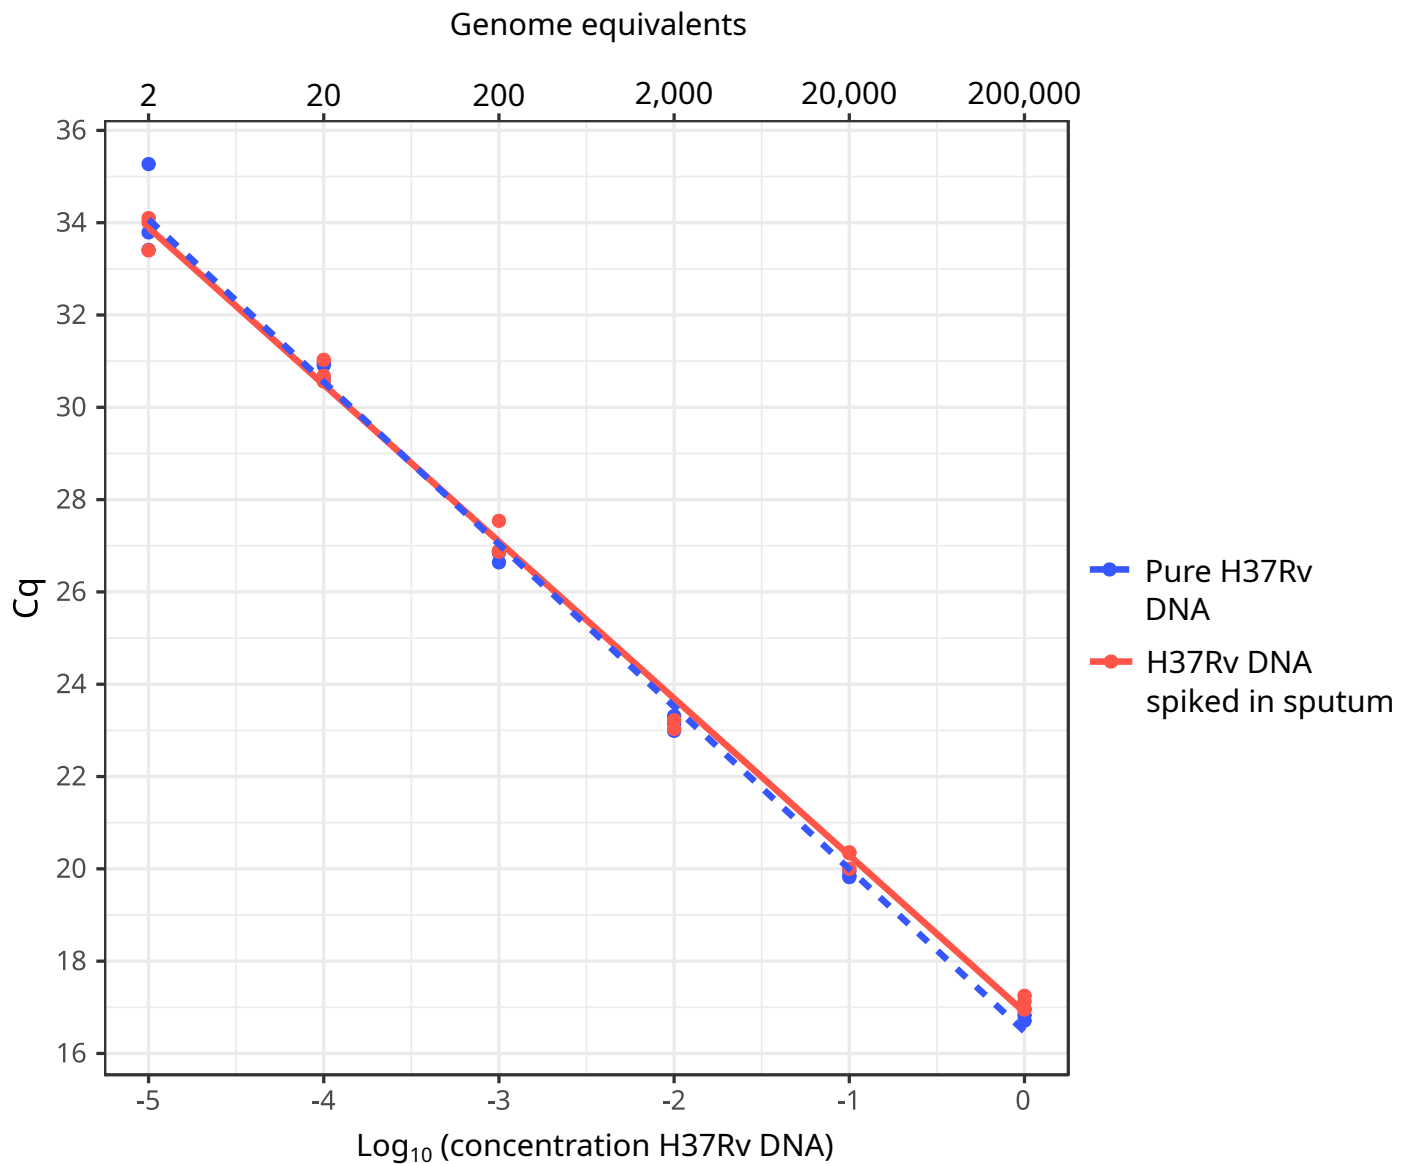

**Figure 2.** Standard curve for the qPCR assay targeting Rv2341 using known quantities of pure H37Rv DNA (in blue; efficiency=95%) and pure H37Rv DNA spiked in sputum samples (in red; efficiency=97%). In the upper x-axis is represented the hypothetical number of genome copies. All qPCR experiments were carried out in triplicates to check for reproducibility.
